# Supplementary material for: Global impact of benthic denitrification on marine N 2 fixation and primary production simulated by a variable-stoichiometry Earth system model
Source: Copernicus journal article supplement (doi:10.5194/egusphere-2024-123), 2024-01-18
Supplement: Supplementary file [file egusphere-2024-123-AC1-supplement.pdf]

## Response to egusphere-2024-123 RC1

Below is our response to RC1. Referee #1's comments are in **bold**. Our responses are in black. Changes to the manuscript are indicated in blue. The line numbers refer to the previously submitted manuscript without track changes.

**In this manuscript, Li et al have implemented benthic denitrification using the empirical function derived by Bohlen et al (2012) on Uni-Vic ESM, and parameterized using chl, O<sub>2</sub>, NO<sub>3</sub>, PO<sub>4</sub>, N\* observations. Relatively speaking they found considering N\* to constrain their model has given better model performance when compared to the observations from WOA13. They found that this implementation has resulted in better simulation of N<sub>2</sub> fixation patterns in the world ocean, and more realistic simulation of ODZs, suggesting that inclusion of benthic denitrification in ESMs are a key piece to improve model performance.**

**I found the procedure and inferences are sound. This work also highlights the importance of consideration of benthic processes in ESMs which are currently underrepresented, and its potential in improving model predictions. I have no major concerns with the present study; however, I feel the following comments will increase the readability of the paper.**

We thank the reviewer for these very positive and helpful comments.

### **Minor comments:**

**Line 23: replace “however, even though” with in spite of.**

NEW: “Research on benthic denitrification has been more limited, **in spite of** the greater part of global ocean denitrification ( $\approx 60 - 75\%$ ) occurring in the sediments (Somes et al., 2013; DeVries et al., 2013; Eugster and Gruber, 2012; Brandes and Devol, 2002).”

**Line 33: “..thus will be..”**

NEW: “Reproducing realistic patterns and rates of denitrification **thus will be** an important aspect for simulating N<sub>2</sub> fixation.”

**Line 35-39: maybe expand a bit on this, exactly what you are going to test?**

OLD: “Contrasting these geochemical inversion estimations, we aim to test the ability of N\* to constrain our prognostic model that includes the representation of large-scale stoichiometric diversity of phytoplankton and diazotrophs (Pahlow et al., 2020).”

NEW: “**We compare the ability of N\* with that of NO<sub>3</sub><sup>-</sup> and PO<sub>4</sub><sup>3-</sup> to constrain parameters of our prognostic model, that includes the representation of large-scale stoichiometric diversity of phytoplankton and diazotrophs (Pahlow et al., 2020).**”

**Line 55: “..description of the..”**

NEW: “Below we provide a brief **description of** the original OPEM implementation in UVic 2.9 (Pahlow et al., 2020), followed by the newly-implemented benthic denitrification.”

**Line 75: Please define what "H" version is meant for, and briefly mention how it is different from OPEM.**

OLD: “The temperature dependence is from the OPEM-H configuration of Pahlow et al. (2020), where growth and nutrient uptake of phytoplankton and diazotrophs follow the same exponential Eppley (1972) temperature function but N<sub>2</sub> fixation is driven by the unimodal function of Houlton et al. (2008) with an optimal temperature of 26°C.”

NEW: “The temperature dependence is from the OPEM-H configuration of Pahlow et al. (2020), which applies the Houlton et al. (2008) unimodal temperature function to N<sub>2</sub> fixation by diazotrophs. The growth and nutrient uptake of phytoplankton and diazotrophs follow the same exponential (Eppley, 1972) temperature function. The temperature dependence in the OPEM configuration is the same as in the original UVic-ESCM, where diazotrophs grow only when temperature is above 15°C. Thus, the only difference between the OPEM and OPEM-H configurations is the temperature dependence of diazotrophs.”

**Line 170-171: it would be good to expand a bit more on this that why this might be the case. Give some perspective.**

OLD: “This suggests that N\* provides a more powerful constraint on water-column denitrification rates, and hence N fixation, than simply combining NO<sub>3</sub><sup>-</sup> and PO<sub>4</sub><sup>3-</sup>.”

NEW: “This suggests that N\* provides a better, more independent constraint on water-column denitrification rates, and hence N fixation, than simply combining NO<sub>3</sub><sup>-</sup> and PO<sub>4</sub><sup>3-</sup>. NO<sub>3</sub><sup>-</sup> and PO<sub>4</sub><sup>3-</sup> are highly correlated, largely following the Redfield N:P ratio. The correlations between different data (Chl, NO<sub>3</sub><sup>-</sup>, PO<sub>4</sub><sup>3-</sup> and O<sub>2</sub>) are already accounted for by our misfit metric (Chien et al., 2020; Krishna et al., 2019). However, N\* not only accounts for the correlation between NO<sub>3</sub><sup>-</sup> and PO<sub>4</sub><sup>3-</sup>, but can be related directly to non-Redfield processes, such as N<sub>2</sub> fixation, denitrification, or variations in particulate C:N:P stoichiometry.”

**Line 180-181: Expand a bit more on the export production. What percentage of NPP is exported to the deep ocean and how does it compare to the estimates elsewhere.**

OLD: “The new estimates of export production at 130m (model euphotic depth) are relatively close to and slightly lower than no\_bdeni (Table 2), yielding higher export efficiencies (export production / NPP) than no\_bdeni.”

NEW: “Export production at 130m (model euphotic depth) ranges from 6.9 to 7.9 Pg C yr<sup>-1</sup>, slightly lower than that of no\_bdeni (8.7 Pg C yr<sup>-1</sup>, Table 2), yielding higher export efficiencies (export production / NPP) than no\_bdeni. Approximately 13% of NPP is exported as sinking particles to the deep ocean among our new solutions (Table 2). Simulated export production at 100m in the Coupled Model Intercomparison Project Phase 5 (CMIP5) and newer CMIP6 models range from about 4.5 to 7.5 Pg C yr<sup>-1</sup> (Bopp et al., 2013; Laufkötter et al., 2016; Fu et al., 2016) and 5 to 12 Pg C yr<sup>-1</sup> (Séférián et al., 2020; Henson et al., 2022), respectively. Thus, our estimates fall within the CMIP6 spread. Other data-assimilated global ecosystem and biogeochemistry models yield particulate organics carbon export across the 100m depth horizon of 8.25 (Wang et al., 2023), 6.4 (Nowicki et al., 2022), and 6.7 Pg C yr<sup>-1</sup> (DeVries and Weber, 2017), yielding export ratios between 12% and 16%.”

Correspondingly, we will revise Table 2 with export ratios.

| variable                          | model configuration |                                    |               |          | units                 |
|-----------------------------------|---------------------|------------------------------------|---------------|----------|-----------------------|
|                                   | no_bdeni            | calib_NO <sub>3</sub> <sup>-</sup> | calib_N*_only | calib_N* |                       |
| N <sub>2</sub> fixation           | 69.5                | 95.5                               | 136.1         | 137.7    | Tg N yr <sup>-1</sup> |
| Water-column Deni. (W)            | 69.5                | 2.8                                | 42.4          | 30.3     | Tg N yr <sup>-1</sup> |
| Benthic Deni. (B)                 | 0                   | 91.4                               | 94.4          | 105.5    | Tg N yr <sup>-1</sup> |
| B/W                               | –                   | 32.6                               | 2.2           | 3.5      | 1                     |
| B <sub>continental_shelf</sub> /B | –                   | 0.5                                | 0.6           | 0.5      | 1                     |
| NPP                               | 88                  | 52.8                               | 63.0          | 59.3     | Pg C yr <sup>-1</sup> |
| Export production (at 130m)       | 8.7                 | 6.9                                | 8.1           | 7.9      | Pg C yr <sup>-1</sup> |
| EP/NPP                            | 9.9                 | 13.1                               | 12.9          | 13.3     | %                     |

**Line 197: “fixed-N nitrogen” only one nitrogen.**

OLD: “The global oceanic fixed-N nitrogen inventory is maintained by balanced supply of N by N<sub>2</sub> fixation at the surface ocean and removal by water-column and benthic denitrification.”

NEW: “The global oceanic **fixed-N** inventory is maintained by the balance of N<sub>2</sub> fixation **in** the surface ocean and water-column and benthic denitrification. ”

**Line 279-280: Not clear to me. Please explain. In figure 8, Calib\_N\* - no\_bdeni values are mostly positive, that means Calib\_N\* has more O<sub>2</sub> in the ocean, I see that in figure 6 as well. But how does the prediction of ODZs in no\_bden case. If is a bit confusing, please clarify in the text.**

To make it clear, we will add a row of ODZ volumes of all simulations in Table 2. If we define ODZ as the region with O<sub>2</sub> concentration < 5 mmol m<sup>-3</sup>, the ODZ volume in no\_bdeni is >10<sup>15</sup>m<sup>3</sup>, whereas that of calib\_N\* is 6.58\*10<sup>14</sup>m<sup>3</sup>.

OLD: “This implies that including benthic denitrification may improve the representation of ODZs in global ocean biogeochemical models that typically overestimate their volume (Cabr  et al., 2015).”

NEW: “**The lower ODZ volume when including benthic denitrification (Table 2)** implies that including benthic denitrification may improve the representation of ODZs in global ocean biogeochemical models that typically overestimate their volume (Cabr  et al., 2015).”

**287-298: It will be nice to add a third row of figures on figure 9 plotting the EP ratio. Also, can you comment on the EP ratio how it compares to any other literature (observation or modeling)? It is good to put this information as the rain rate to the seafloor will ultimately drive the denitrification in the model.**

Thank you for the suggestion. We will add the e-ratios in Figure 9.

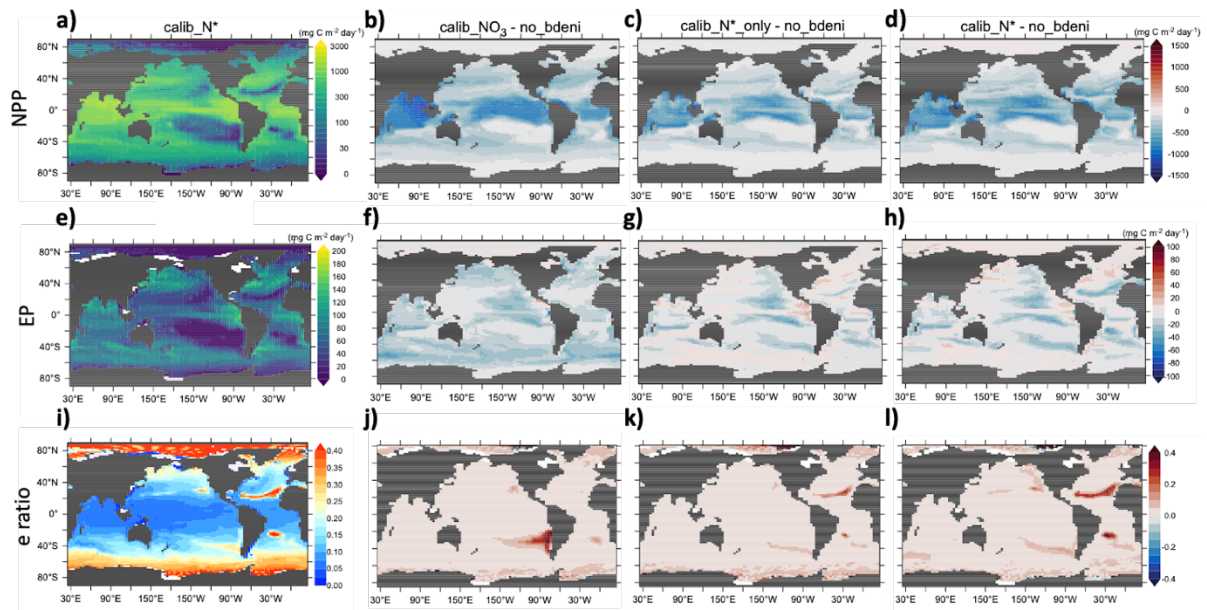

We will add the description of spatial distribution of e-ratio and comparison with other literature in L291: “The global distribution of export efficiency (EP/NPP, hereafter e-ratio) exhibits a negative relationship between NPP and e-ratio. Low e-ratios (<0.2) in low latitudes and high e-ratios (>0.2) in high latitudes, with a few exceptions in the Atlantic and Pacific subtropical gyres (Fig. 9i). Its general pattern is similar to the observational estimate of Dunne et al. (2005) and the model estimate of Henson et al. (2015). ”

**305: I think you have not put any number of observational estimates of N fixation, if not please provide some number in relevant places.**

OLD: “The absence of a persistent ODZ in the Arabian in our model is likely a reason why our global water-column denitrification and N<sub>2</sub> fixation rates are on the low-end of observational estimates.”

NEW: “The absence of a persistent ODZ in the Arabian Sea in our model is likely a reason why our global water-column denitrification and N<sub>2</sub> fixation rates are on the low-end of observational estimates range from 131 to 253 Tg N yr<sup>-1</sup> (Großkopf et al., 2012; Luo et al., 2012; Landolfi et al., 2018; Shao et al., 2023).”

To make it easier to compare our estimates with other observational estimates, we now indicate the observational estimates with an uncertainty range of 131 to 253 Tg N yr<sup>-1</sup> as a shaded grey area in Fig.2.

**Define what is biome when it first occurs.**

Line 119: We will add “Ocean biomes are geographical regions characterized by coherent large-scale patterns in physical and biogeochemical functions (Fay and McKinley, 2014), providing a representation of global ocean biogeography.”

**If the Arabian sea has one, how does it compare with other modelled areas/seas?**

Thank you for the question. In the cost function, each biome is characterised by two numbers for each depth layer (and month for the upper 5 layers of UVic): the spatial average and variance within the biome. In this study, we consider the Indian Ocean as a single biome including the Arabian Sea, thus the spatial average and variance of physical and

biogeochemical variables within the whole Indian Ocean is taken into account in the cost function. If we consider the Arabian Sea to be one biome, the model calibration will explicitly reflect the spatial average and variance of its physical and biogeochemical variables, providing the same importance in cost function as other biomes.

We will clarify further the calculation of the cost function in Section 2.4.2 (Line 116) as below.

OLD: “To assess the model performance with respect to the spatial distributions of dissolved tracers and surface chlorophyll a, we apply global misfit metrics  $J$  based on a maximum-likelihood estimation (ML) method for parameters, assuming log-normally distributed errors, with observations grouped by distinct biogeochemical biomes (Fay and McKinley, 2014), as described in Chien et al. (2020). Briefly, the calculation of our cost function comprises two terms for every depth level in our model,

$$J_k = \mathbf{d}_k^T \mathbf{R}_k^{-1} \mathbf{d}_k + \mathbf{v}_k^T \mathbf{V}_k^{-1} \mathbf{v}_k, k \in \{1, 2, \dots, 19\} \quad (1)$$

where the residual ( $d$ ) between observations ( $o$ ) and the model ( $m$ ) within each biome is defined as  $d = o - m$ , and the discrepancy in the spatial variance ( $v$ ) as  $v = v(o) - v(m)$ . For each variable included in the cost function, we normalize the concentrations to threshold values and log-transform to achieve approximately Gaussian error distributions for  $d$  and  $v$  with zero mean and covariance matrices  $R$  and  $V$ , respectively. We integrate the results across the 17 biomes, applying Eq. (1) to monthly means for the upper 550m (top 5 layers in UVic) and annual means below (bottom 14 layers).”

NEW: “To assess the model performance with respect to the spatial distributions of dissolved tracers and surface chlorophyll a, we apply global misfit metrics  $J$  based on a maximum-likelihood estimation (ML) method for parameters, assuming [that the errors for the residuals of log-transformed variables between model simulations and observations follow normal distributions](#) (Chien et al., 2020). [Minimizing  \$J\$  ensures the best parameter estimates for the given model configuration.](#)

[Instead of calculating residuals between model simulations and observations for each model grid cell, we categorize model simulations and observations into 17 biomes \(Fay and McKinley 2014\), . Ocean biomes are geographical regions characterized by coherent large-scale patterns in physical and biogeochemical functions \(Fay and McKinley 2014\), providing a representation of global ocean biogeography. We include two statistical measures of variables at each biome to represent it: spatial average and variance. Therefore, the residuals consist of the discrepancies in both spatial average and variance of each biome. In the vertical spatial dimension, we do not make any simplifications and residuals are calculated at each depth layer \( \$k\$ \). We calculate the residuals of variables between monthly-averaged simulations and observations to resolve seasonal variations in the upper ocean \(0-550m\), and between annually-averaged simulations and observations below 550m.](#)

Thus, the calculation of our cost function comprises [two components](#),

$$J_k = \mathbf{A}_k^T \mathbf{\Sigma}_k^{-1} \mathbf{A}_k + \mathbf{V}_k^T \mathbf{Q}_k^{-1} \mathbf{V}_k, \quad k \in \{1, 2, \dots, 19\} \quad (1)$$

where  $\mathbf{A}$  is the residual between the [spatial means](#) of observations ( $\mathbf{o}$ ) and the model ( $\mathbf{m}$ ) defined as  $\mathbf{A} = \text{mean}(\mathbf{o}) - \text{mean}(\mathbf{m})$  and  $\mathbf{V}$  is the residual in the spatial variance ( $\text{var}$ ) as  $\mathbf{V} = \text{var}(\mathbf{o}) - \text{var}(\mathbf{m})$ . [The covariance matrices of  \$\mathbf{A}\$  and  \$\mathbf{V}\$  are denoted by  \$\mathbf{\Sigma}\$  and  \$\mathbf{Q}\$ , respectively.](#)”

**325-326: Define what is  $w_{d0}$  and  $w_{dd}$ , when it appears first.**

$W_{dd}$  is defined at Line 96 and we will modify Line 325–326 as below.

OLD: “Improvements to the upper ocean may also have the potential to improve the deep-ocean performance, such as including  $w_{do}$  into the calibrated parameters. By taking both  $w_{do}$  (particle sinking velocity at the surface ocean) and  $w_{dd}$  into account for the calibration, ...”

NEW: “Improvements to the upper ocean may also have the potential to improve the deep-ocean performance, such as including the [sinking speed of particles at the ocean surface \( \$w\_{do}\$ \) in addition to its increase with depth \( \$w\_{dd}\$ \)](#) into the set of calibrated parameters. By taking both  $w_{do}$  and  $w_{dd}$  into account for the calibration, ...”

**339-340: first part of this sentence is not clear.**

OLD: “In order to explore the sensitivity to prior assumptions, we applied our cost function to calibrate model solutions against three different combinations of observations.”

NEW: “In order to explore the sensitivity to prior assumptions [about which data are used for calibration](#), we applied our cost function to three different combinations of observations.”

**345: “demonstrates”**

OLD: “The greater constraining capacity of  $N^*$  in comparison to considering nitrate and phosphate separately highlights the importance of accounting for correlations among variables within the cost function (Krishna et al., 2019) and demonstrates the power of diagnostic tracers such as  $N^*$  for diagnostic studies of the ocean nitrogen cycle (DeVries et al., 2013; Eugster and Gruber, 2012; Deutsch et al., 2007).”

NEW: “The greater constraining capacity of  $N^*$  in comparison to considering nitrate and phosphate separately highlights the importance of accounting for correlations among variables within the cost function (Krishna et al., 2019) and [demonstrates](#) the power of diagnostic tracers such as  $N^*$  for diagnostic studies of the ocean nitrogen cycle (DeVries et al., 2013; Eugster and Gruber, 2012; Deutsch et al., 2007).”

**Figure 2: Any reference for NPP to compare with?**

Figure 2: [we will mark published estimates of NPP as grey area.](#)

**Figure 5: explain why you did not include Indian ocean and southern ocean.**

Figure 5: [we will add the Indian and Southern Ocean.](#)

Section 3.3.2: add description of Indian and Southern Ocean.

**Figure 6 caption: Typo.**

OLD: “Vertical distributions of tracers ( $\text{NO}_3^-$ ,  $\text{PO}_3^{4-}$ ,  $N^*$ ,  $\text{O}_2$ ) in global and respect basins (Atlantic, Pacific, Indian, Southern Oceans).”

NEW: “Vertical distributions of tracers ( $\text{NO}_3^-$ ,  $\text{PO}_3^{4-}$ ,  $N^*$ ,  $\text{O}_2$ ) in [the global ocean and the Atlantic, Pacific, Indian, Southern Oceans.](#)”

**Figure 8 caption: three solutions or  $N^*$ ?**

yes, it should be solution calib\_ $N^*$ . We removed “of three new solutions”.

**Table 1 caption: units. Typo.**

Table 1 caption: Parameter names, ranges, [units](#) and descriptions.

**Table 1: did you get the reference range from somewhere? please clarify.**

yes, the reference range comes from Pahlow et al., 2020 and Chien et al., 2020. We added the clarification “[The reference range refers to the calibration range in Pahlow et al. \(2020\); Chien et al. \(2020\)](#)” below the table.

**Table A1: Why do you provide bar on top of TN? It is not defined in the table.**

The bar on top of TN\* means the average of TN\* of each basin. We added the definition in the table title.

References

Bopp, Laurent, Laure Resplandy, James C. Orr, Scott C. Doney, John P. Dunne, M. Gehlen, P. Halloran, et al. 2013. “Multiple Stressors of Ocean Ecosystems in the 21st Century: Projections with CMIP5 Models.” *Biogeosciences* 10: 6225–45.

Brandes, Jay A., and Allan H. Devol. 2002. “A Global Marine-Fixed Nitrogen Isotopic Budget: Implications for Holocene Nitrogen Cycling.” *Global Biogeochemical Cycles* 16 (4): 67-1-67–14.

Cabré, A., I. Marinov, R. Bernardello, and D. Bianchi. 2015. “Oxygen Minimum Zones in the Tropical Pacific across CMIP5 Models: Mean State Differences and Climate Change Trends.” *Biogeosciences* 12 (18): 5429–54.

Chien, Chia-Te, Markus Pahlow, Markus Schartau, and Andreas Oschlies. 2020. “Optimality-Based Non-Redfield Plankton–Ecosystem Model (OPEM v1.1) in UVic-ESCM 2.9 – Part 2: Sensitivity Analysis and Model Calibration.” *Geoscientific Model Development* 13 (10): 4691–4712.

DeVries, Tim, and Thomas Weber. 2017. “The Export and Fate of Organic Matter in the Ocean: New Constraints from Combining Satellite and Oceanographic Tracer Observations.” *Global Biogeochemical Cycles* 31 (3): 535–55.

DeVries, T., C. Deutsch, P. A. Rafter, and F. Primeau. 2013. “Marine Denitrification Rates Determined from a Global 3-D Inverse Model.” *Biogeosciences* 10 (4): 2481–96.

Dunne, John P., Robert A. Armstrong, Anand Gnanadesikan, and Jorge L. Sarmiento. 2005. “Empirical and Mechanistic Models for the Particle Export Ratio.” *Global Biogeochem. Cycles* 19 (December). <https://doi.org/10.1029/2004GB002390>.

Eppley, R. W.: Temperature and phytoplankton growth in the sea, *Fishery Bulletin*, 70, 1063–1085, 1972.

Eugster, Olivier, and Nicolas Gruber. 2012. “A Probabilistic Estimate of Global Marine N-fixation and Denitrification.” *Global Biogeochemical Cycles* 26 (4). <https://doi.org/10.1029/2012gb004300>.

Fay, A. R., and G. A. McKinley. 2014. “Global Open-Ocean Biomes: Mean and Temporal Variability.” *Earth System Science Data* 6 (2): 273–84.

Fu, Weiwei, James T. Randerson, and J. Keith Moore. 2016. "Climate Change Impacts on Net Primary Production (NPP) and Export Production (EP) Regulated by Increasing Stratification and Phytoplankton Community Structure in the CMIP5 Models." *Biogeosciences* 13 (18): 5151–70.

Henson, Stephanie A., Charlotte Laufkötter, Shirley Leung, Sarah L. C. Giering, Hilary I. Palevsky, and Emma L. Cavan. 2022. "Uncertain Response of Ocean Biological Carbon Export in a Changing World." *Nature Geoscience* 15 (4): 248–54.

Houlton, Benjamin Z., Ying-Ping Wang, Peter M. Vitousek, and Christopher B. Field. 2008. "A Unifying Framework for Dinitrogen Fixation in the Terrestrial Biosphere." *Nature* 454 (7202): 327–30.

Landolfi, Angela, Paul Kähler, Wolfgang Koeve, and Andreas Oschlies. 2018. "Global Marine N<sub>2</sub> Fixation Estimates: From Observations to Models." *Frontiers in Microbiology* 9 (September): 2112.

Henson, S. A., A. Yool, and R. Sanders (2015), Variability in efficiency of particulate organic carbon export: A model study, *Global Biogeochem. Cycles*, 29, 33–45, doi:[10.1002/2014GB004965](https://doi.org/10.1002/2014GB004965).

Großkopf, Tobias, Wiebke Mohr, Tina Baustian, Harald Schunck, Diana Gill, Marcel M. M. Kuypers, Gaute Lavik, Ruth A. Schmitz, Douglas W. R. Wallace, and Julie LaRoche. 2012. "Doubling of Marine Dinitrogen-Fixation Rates Based on Direct Measurements." *Nature* 488 (7411): 361–64.

Krishna, Shubham, Markus Pahlow, and Markus Schartau. 2019. "Comparison of Two Carbon-Nitrogen Regulatory Models Calibrated with Mesocosm Data." *Ecological Modelling* 411 (November): 108711.

Laufkötter, Charlotte, Meike Vogt, Nicolas Gruber, Olivier Aumont, Laurent Bopp, Scott C. Doney, John P. Dunne, et al. 2016. "Projected Decreases in Future Marine Export Production: The Role of the Carbon Flux through the Upper Ocean Ecosystem." *Biogeosciences* 13 (13): 4023–47.

Luo, Y-W, S. C. Doney, L. A. Anderson, M. Benavides, I. Berman-Frank, A. Bode, S. Bonnet, et al. 2012. "Database of Diazotrophs in Global Ocean: Abundance, Biomass and Nitrogen Fixation Rates." *Earth System Science Data* 4 (1): 47–73.

Nowicki, Michael, Tim DeVries, and David A. Siegel. 2022. "Quantifying the Carbon Export and Sequestration Pathways of the Ocean's Biological Carbon Pump." *Global Biogeochemical Cycles* 36 (3). <https://doi.org/10.1029/2021gb007083>.

Pahlow, Markus, Chia-Te Chien, Lionel A. Arteaga, and Andreas Oschlies. 2020. "Optimality-Based Non-Redfield Plankton–Ecosystem Model (OPEM v1.1) in UVic-ESCM 2.9 – Part 1: Implementation and Model Behaviour." *Geoscientific Model Development* 13 (10): 4663–90.

Séférian, Roland, Sarah Berthet, Andrew Yool, Julien Palmiéri, Laurent Bopp, Alessandro Tagliabue, Lester Kwiatkowski, et al. 2020. "Tracking Improvement in Simulated Marine Biogeochemistry Between CMIP5 and CMIP6." *Current Climate Change Reports* 6 (3): 95–119.



Shao, Zhibo, Yangchun Xu, Hua Wang, Weicheng Luo, Lice Wang, Yuhong Huang, Nona Sheila R. Agawin, et al. 2023. "Global Oceanic Diazotroph Database Version 2 and Elevated Estimate of Global Oceanic N<sub>2</sub> Fixation." *Earth System Science Data* 15 (8): 3673–3709.

Somes, C. J., A. Oschlies, and A. Schmittner. 2013. "Isotopic Constraints on the Pre-Industrial Oceanic Nitrogen Budget." *Biogeosciences* 10 (9): 5889–5910.

Wang, Wei-Lei, Weiwei Fu, Frédéric A. C. Le Moigne, Robert T. Letscher, Yi Liu, Jin-Ming Tang, and François W. Primeau. 2023. "Biological Carbon Pump Estimate Based on Multidecadal Hydrographic Data." *Nature* 624 (7992): 579–85.
